# Supplementary material for: Targeting Hedgehog Pathway and DNA Methyltransferases in Uterine Leiomyosarcoma Cells
Source: PubMed Central journal article supplement (PMC7824187; doi:10.3390/cells10010053), 2020-12-31

**Table S1:** qRT-PCR primers sequences

| <b>Gene / Symbol</b> | <b>Forward sequence</b> | <b>Reverse sequence</b>  | <b>Amplicon Size (pb)</b> | <b>Melt temperature (°C)</b> |
|----------------------|-------------------------|--------------------------|---------------------------|------------------------------|
| <i>SHH</i>           | TGCTGCTAGTCCTCGTCTCCT   | TTTTGGGGTGCCTCCTCTT      | 90                        | F: 62.41<br>R: 58.72         |
| <i>DHH</i>           | TGATGACCGAGCGTTGTAAG    | GCCAGCAACCCATACTTGT      | 196                       | F: 58.01<br>R: 58.04         |
| <i>IHH</i>           | CATTGAGACTTGACTGGGCAAC  | AGAGCAGGCTGAGTTGGGAGTCGC | 152                       | F: 59.77<br>R: 68.53         |
| <i>PTCH1</i>         | GAGCAGATTTCCAAGGGGAAGG  | ATGAGGAGGCCCAACCAA       | 137                       | F: 60.95<br>R: 61.43         |
| <i>SMO</i>           | TGAAGGCTGCACGAATGAGG    | CTTGGGGTTGTCTGTCCGAA     | 88                        | F: 60.67<br>R: 59.89         |
| <i>GLI1</i>          | AGCCTTCAGCAATGCCAGTGAC  | GTCAGGACCATGCACTGTCTTG   | 151                       | F: 63.67<br>R: 61.45         |
| <i>GLI2</i>          | CTGTGGGTTAGGGATGGACTG   | GTAAAGTGGGTGGACGTTGCA    | 147                       | F: 59.79<br>R: 61.08         |
| <i>GLI3</i>          | GTGCTCCACTCGAACAGA      | TCCAGGACTTTCATCCTCATTAGA | 76                        | F: 56.61<br>R: 58.72         |
| <i>DNMT1</i>         | CCATCAGGCATTCTACCA      | CGTTCTCCTTGTCTTCTCT      | 132                       | F: 53.52<br>R: 53.85         |
| <i>DNMT3a</i>        | TATTGATGAGCGCACAAGAGAGC | GGGTGTTCCAGGGTAACATTGAG  | 111                       | F: 61.29<br>R: 61.12         |
| <i>DNMT3b</i>        | GAGTCCATTGCTGTTGGAACCG  | ATGTCCCTCTTGTGCGCCAACCT  | 305                       | F: 62.02<br>R: 63.94         |
| <i>B2M</i>           | CAGCCCAAGATAGTTAAGTG    | CCCTCCTAGAGCTACCTGT      | 262                       | F: 53.40<br>R: 56.75         |

**Table S2:** Description of the antibodies used for WB analyses

| <b>Antibodies</b> | <b>Brand</b>   | <b>Species Raised, Monoclonal or Polyclonal</b> | <b>Dilution</b> |
|-------------------|----------------|-------------------------------------------------|-----------------|
| SMO               | GeneTex        | Rabbit, polyclonal                              | 1:500           |
| GLI1              | Cell Signaling | Rabbit, monoclonal                              | 1:1000          |
| GLI2              | BioRad         | Rabbit, monoclonal                              | 1:1000          |
| GLI3              | GeneTex        | Rabbit, polyclonal                              | 1:1000          |
| DNMT1             | Santa Cruz     | Rabbit, polyclonal                              | 1:1000          |
| DNMT3a            | Santa Cruz     | Goat, polyclonal                                | 1:1000          |
| PCNA              | Santa Cruz     | Rabbit, polyclonal                              | 1:1000          |
| PARP              | Santa Cruz     | Rabbit, polyclonal                              | 1:1000          |
| RHOGDI            | Santa Cruz     | Rabbit, polyclonal                              | 1:1000          |
| $\beta$ -ACTIN    | Sigma Aldrich  | Mouse, monoclonal                               | 1:5000          |

**Figure S3**

**A**

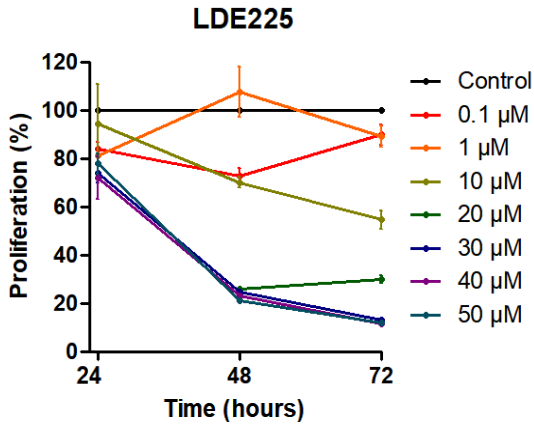

**B**

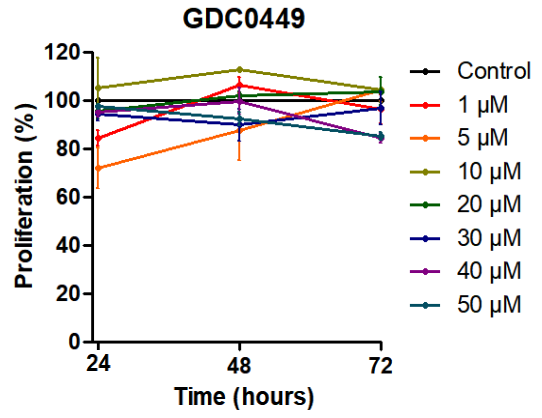

**C**

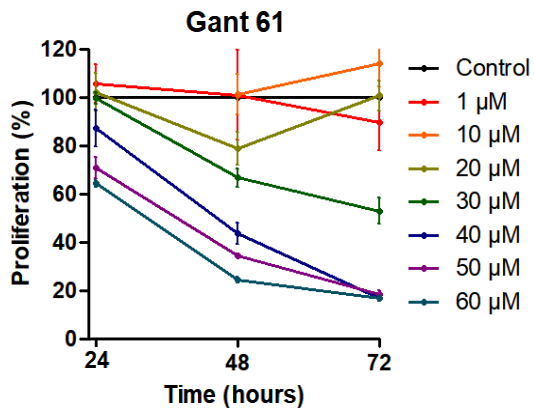

**D**

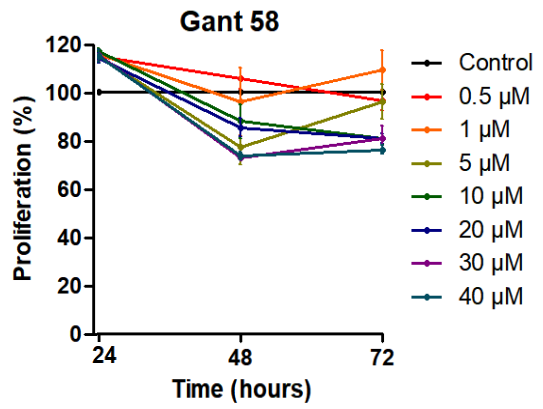

**Figure S4**

**A**

**LDE 225**

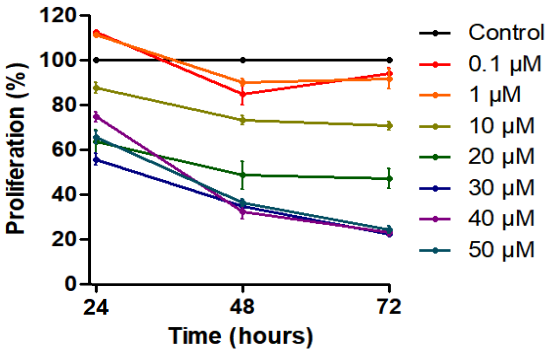

**B**

**Gant 61**

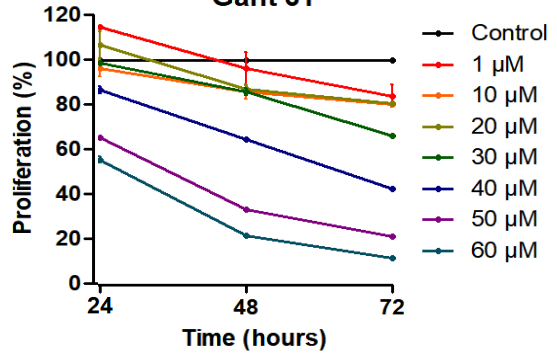

**C**

**LDE 225**

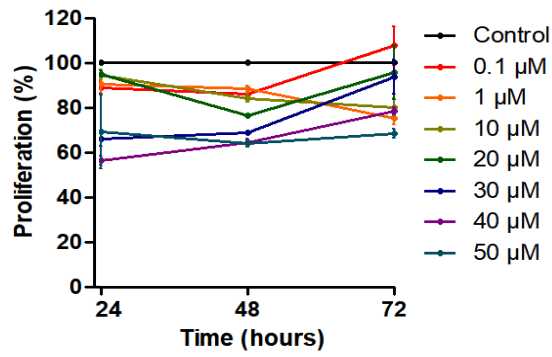

**D**

**Gant 61**

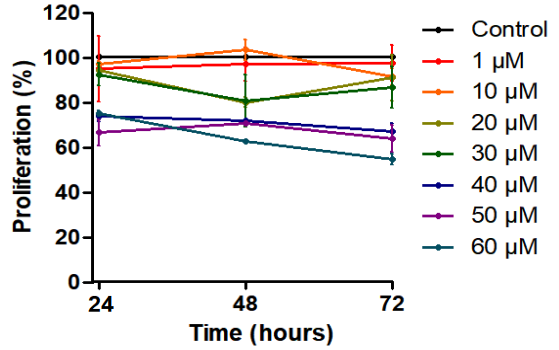

**E**

**LDE 225**

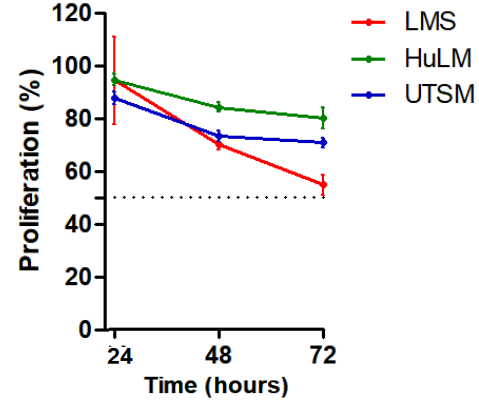

**F**

**Gant 61**

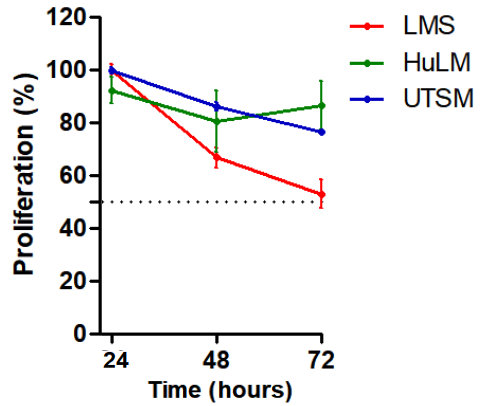

**Figure S5**

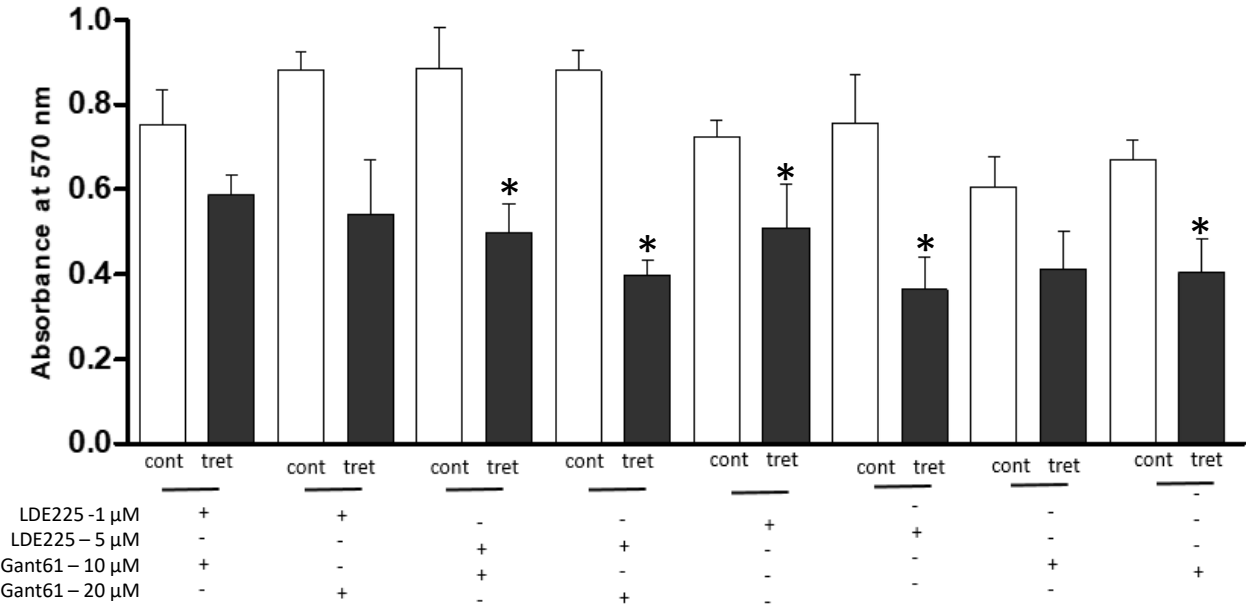

Figure S6

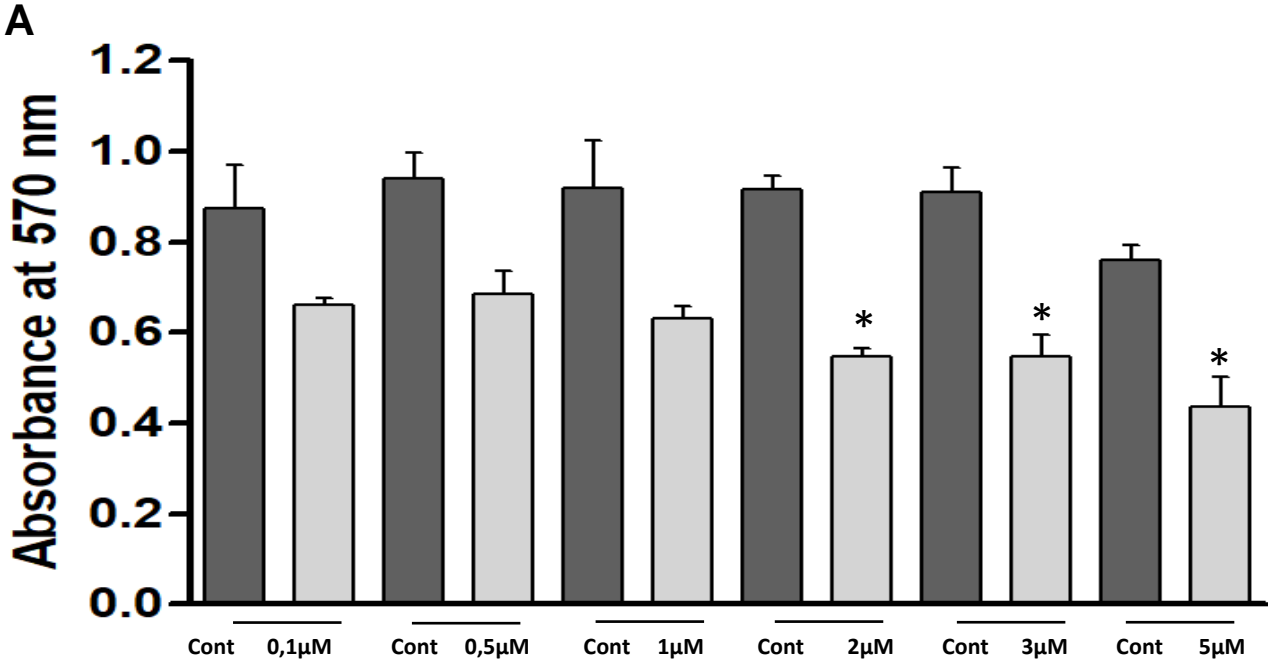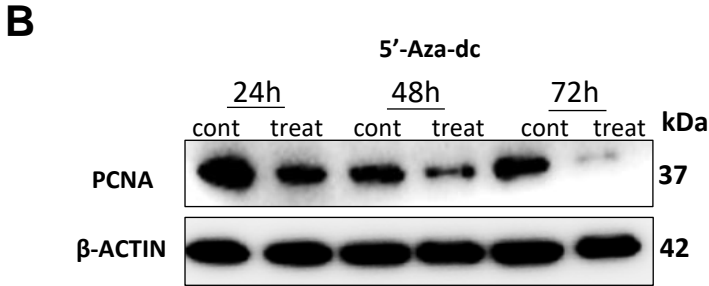

**Figure S7**

**A**

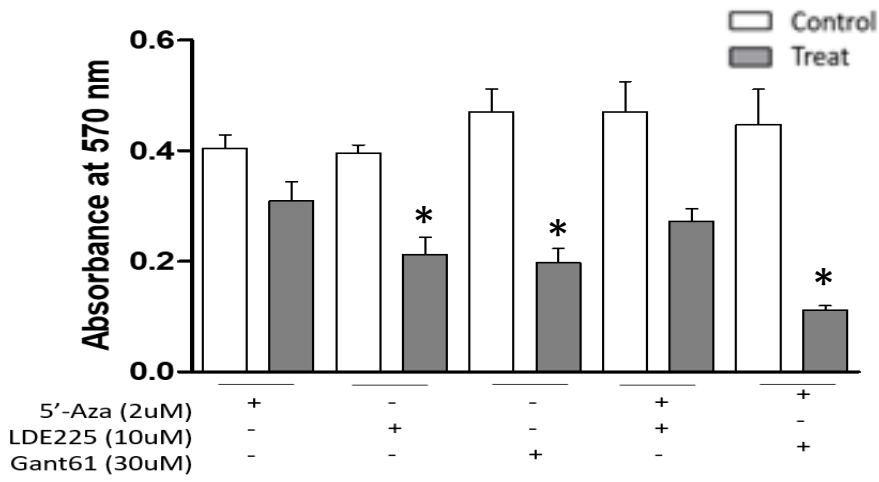

**B**

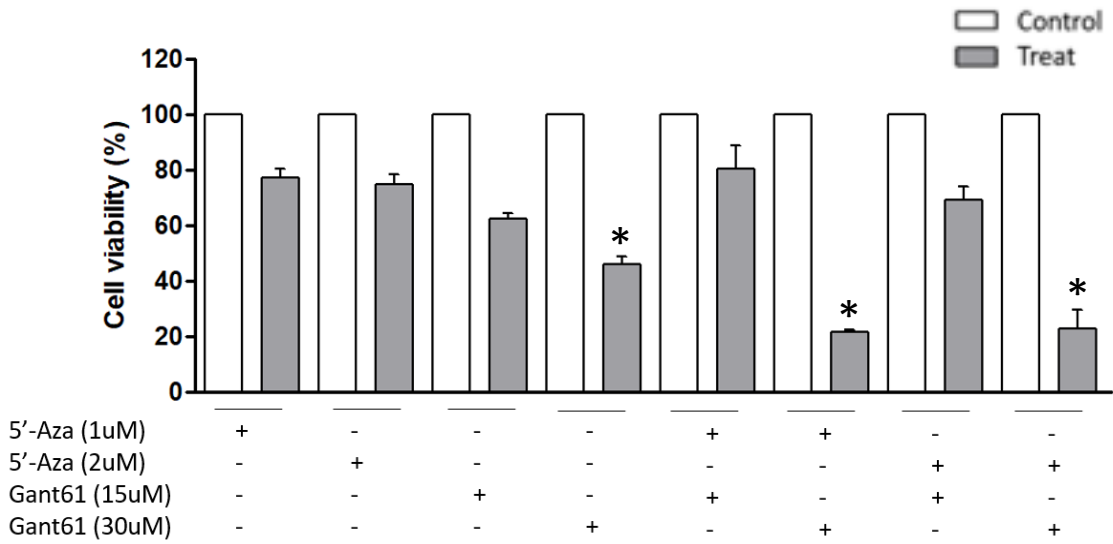

**Figure S8**

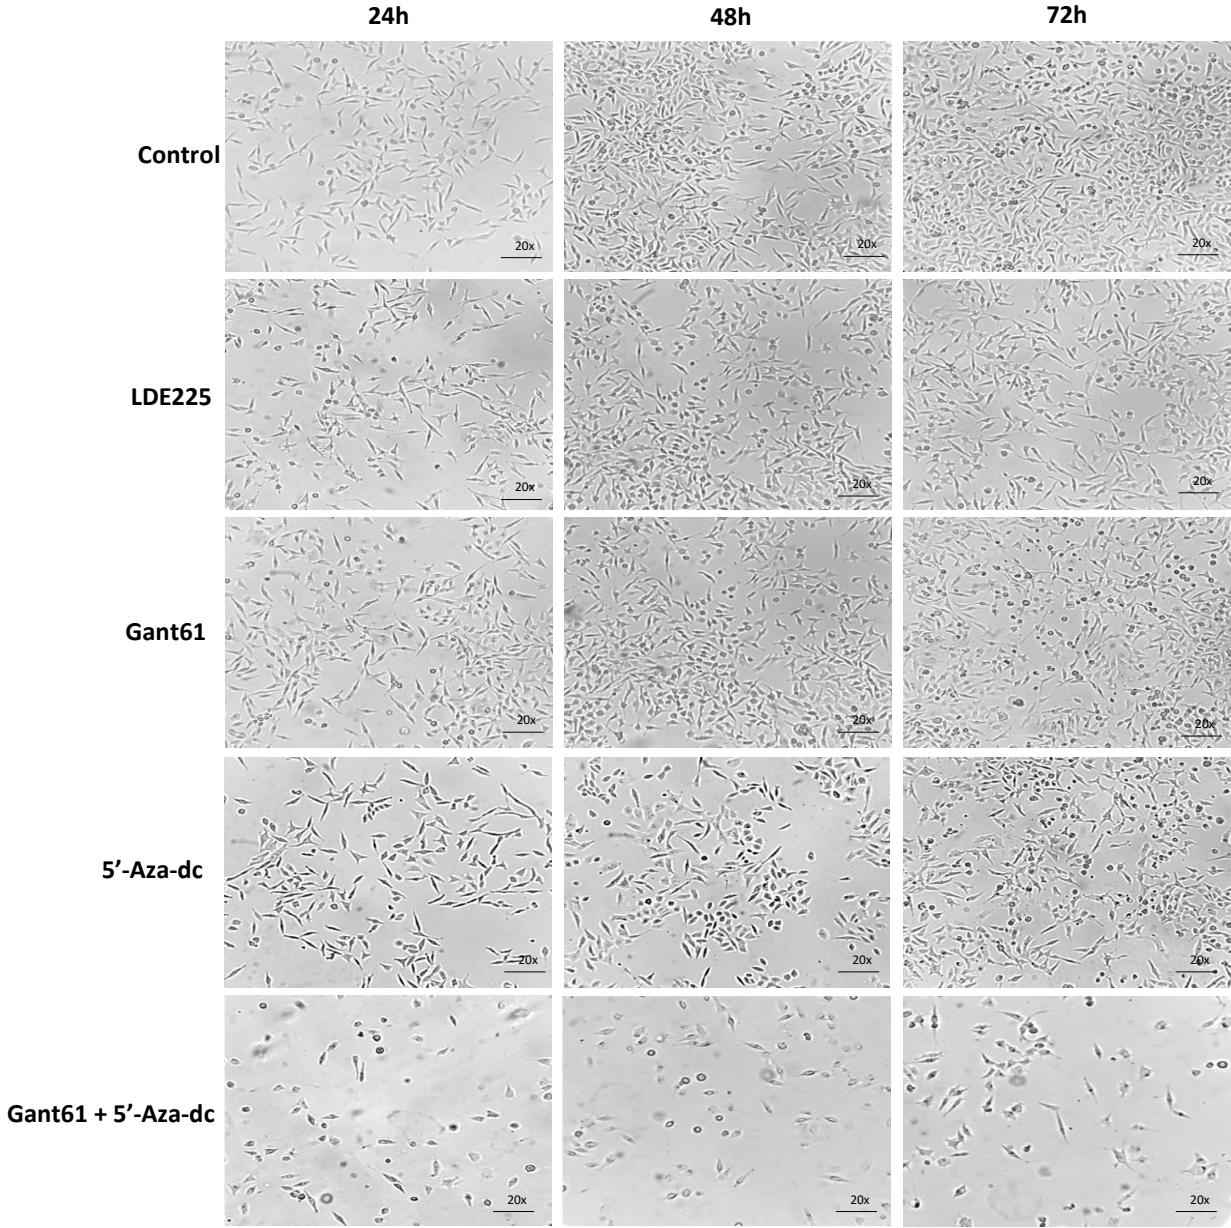

Supplement: cells-10-00053-s001.pdf [file cells-10-00053-s001.pdf]
